# Supplementary material for: Bioadhesive glycosylated nanoformulations for extended trans-corneal drug delivery to suppress corneal neovascularization
Source: Royal Society of Chemistry journal article supplement (doi:10.1039/d1tb00229e), 2021-01-01
Supplement: d1tb00229e1.pdf [file d1tb00229e1.pdf]

## Supplementary Information

### **Bioadhesive glycosylated Nanoformulations for Extended Trans-Cornea Drug**

#### **Delivery to Suppress Corneal Neovascularization**

Yanlong Zhang<sup>a,b,c,§</sup>, Yunjian Yu<sup>d,§</sup>, Gang Li<sup>a,b</sup>, Xinge Zhang<sup>d</sup>, Zhongming Wu<sup>e,\*</sup>,  
Ling Lin<sup>a,b,\*</sup>

<sup>a</sup> State Key Laboratory of Precision Measurement Technology and Instrument, School of Precision Instruments & Opto-Electronics Engineering, Tianjin University, Tianjin 300072, China

<sup>b</sup> Tianjin Key Laboratory of Biomedical Detection Techniques & Instruments, Tianjin University, Tianjin 300072, China

<sup>c</sup> Tianjin International Joint Research and Development Centre of Ophthalmology and Vision Science, Eye Institute and School of Optometry, Tianjin Medical University Eye Hospital

<sup>d</sup> Key Laboratory of Functional Polymer Materials of Ministry of Education, Institute of Polymer Chemistry, College of Chemistry, Nankai University, Tianjin 300071, China

<sup>e</sup> NHC Key Laboratory of Hormones and Development, Tianjin Key Laboratory of Metabolic Diseases, Chu Hsien-I Memorial Hospital & Tianjin Institute of Endocrinology, Tianjin Medical University, Tianjin 300134, China.

\* Corresponding author:

E-mail: wuzhongming@tmu.edu.cn (Z. Wu); linling@tju.edu.cn (L. Lin)

§Yanlong Zhang and Yunjian Yu contributed equally to this work

**Scheme S1. Synthetic route of p(AAPBA-*r*-GEA) glycopolymer**

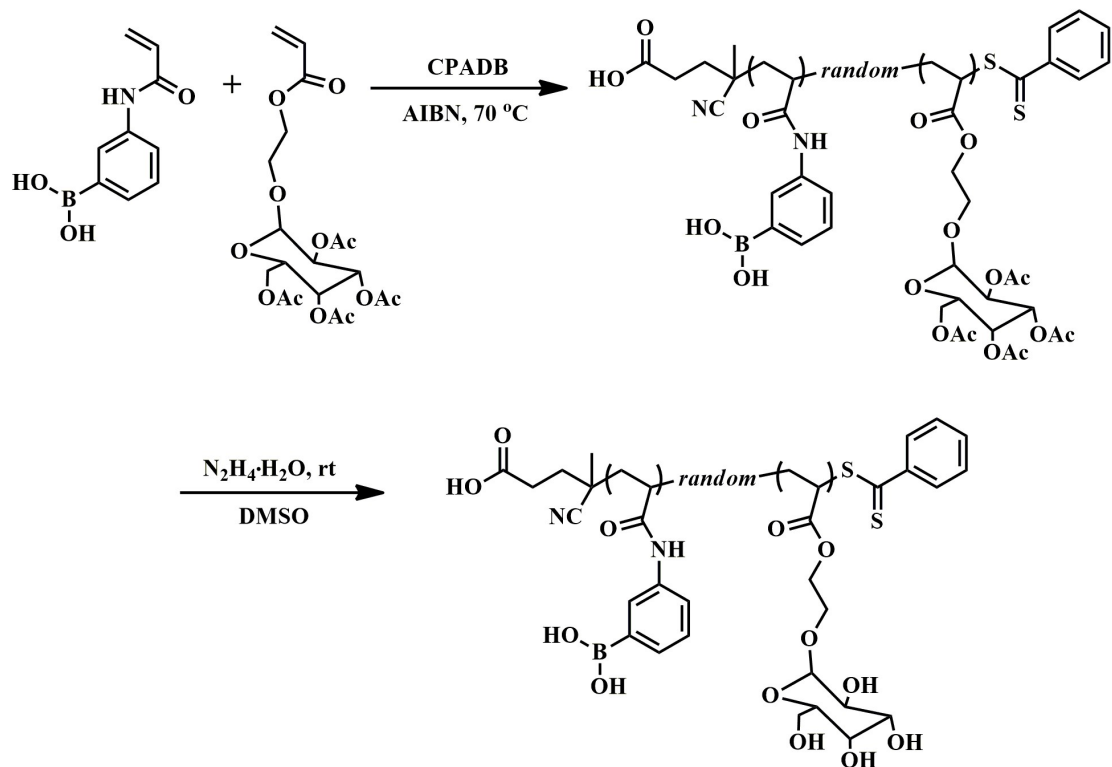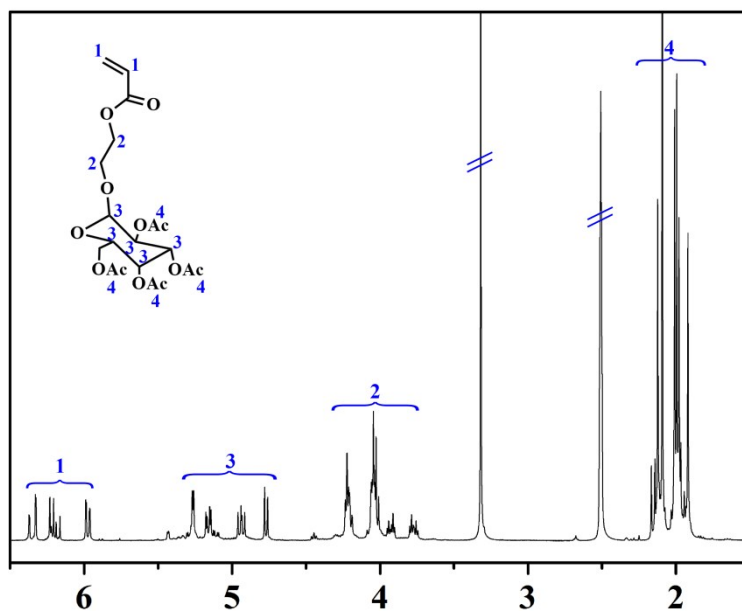

**Fig. S1**  $^1H$  NMR spectrum of AcGEA in  $DMSO-d_6$  at 25 °C.

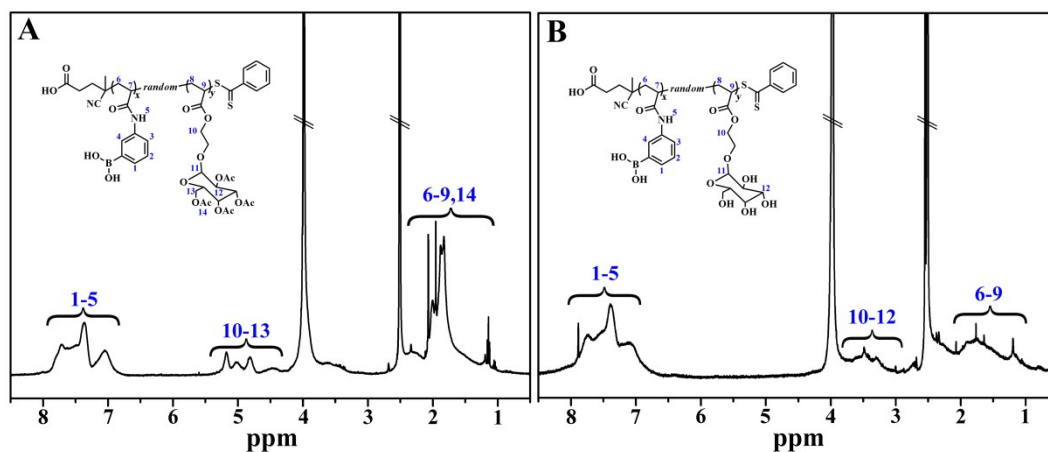

**Fig. S2**  $^1\text{H}$  NMR spectra of glycopolymer (A) p(AAPBA-*r*-AcGEA) and (B) p(AAPBA-*r*-GEA) in  $\text{DMSO-}d_6/\text{D}_2\text{O}$  (v/v, 4/1) at 25 °C.

**Table S1. Constitution of p(AAPBA-*r*-AcGEA) glycopolymers**

| Sample                                                   | Monomer | RAFT agent | Conv (wt %) <sup>b</sup> | AAPBA/AcGEA (mol/mol) |                               |
|----------------------------------------------------------|---------|------------|--------------------------|-----------------------|-------------------------------|
|                                                          |         |            |                          | Theory <sup>a</sup>   | $^1\text{H}$ NMR <sup>b</sup> |
| p(AAPBA <sub>60</sub> - <i>r</i> -AcGEA <sub>40</sub> )  | AcGEA   | AAPBA      | 77.96 ± 6.98             | 1.5                   | 2.1 ± 0.45                    |
| p(AAPBA <sub>80</sub> - <i>r</i> -AcGEA <sub>40</sub> )  | AcGEA   | AAPBA      | 93.29 ± 7.85             | 2                     | 2.9 ± 0.51                    |
| p(AAPBA <sub>100</sub> - <i>r</i> -AcGEA <sub>40</sub> ) | AcGEA   | AAPBA      | 73.13 ± 6.26             | 2.5                   | 3.4 ± 0.42                    |
| <i>p</i>                                                 |         |            | < 0.05                   |                       | > 0.05                        |

<sup>a</sup>The theoretical molar ratio of AAPBA/AcGEA; <sup>b</sup>The approximate polymerization conversion and copolymer compositions were measured on the basis of the integral intensity of the  $^1\text{H}$  NMR spectra.

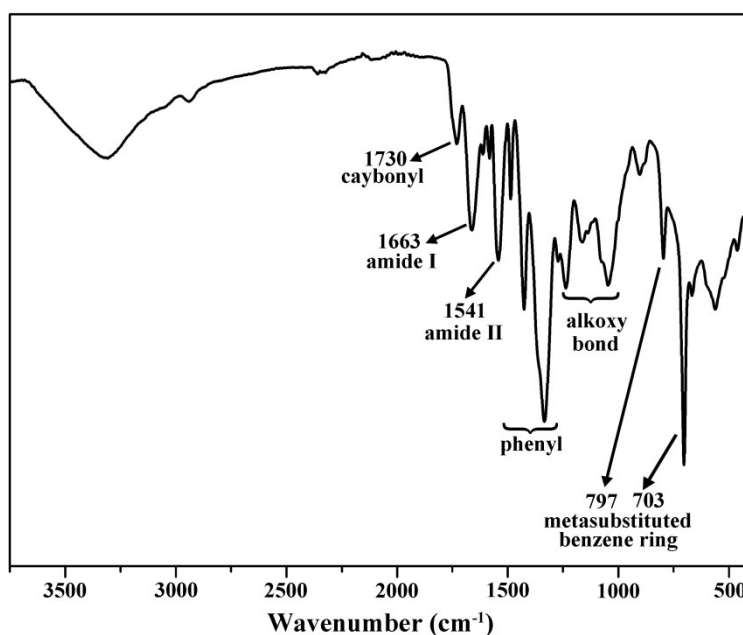

**Fig. S3** FT-IR spectrum of p(AAPBA-*r*-AcGEA).

**Table S2.  $D_H$ , PDI, and zeta potential of p(AAPBA-*r*-GEA) nanoparticles<sup>a</sup>**

| Sample                                                 | $D_H$ (nm)  | PDI         | Zeta potential (mV) |
|--------------------------------------------------------|-------------|-------------|---------------------|
| p(AAPBA <sub>60</sub> - <i>r</i> -GEA <sub>40</sub> )  | 65.6 ± 3.7  | 0.12 ± 0.03 | -20.5 ± 3.4         |
| p(AAPBA <sub>80</sub> - <i>r</i> -GEA <sub>40</sub> )  | 110.0 ± 4.3 | 0.09 ± 0.02 | -29.7 ± 3.9         |
| p(AAPBA <sub>100</sub> - <i>r</i> -GEA <sub>40</sub> ) | 123.3 ± 5.4 | 0.22 ± 0.04 | -15.5 ± 2.5         |
| <i>p</i>                                               | < 0.05      | < 0.05      | < 0.05              |

<sup>a</sup> Each experiment was performed in triplicate and the results were reported as mean ± SD.

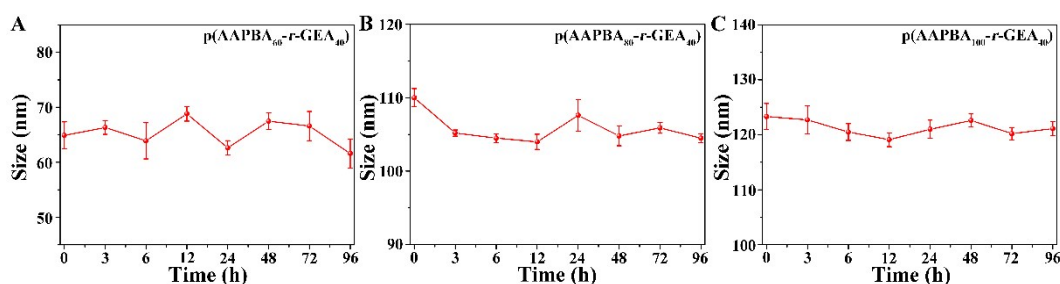**Fig. S4** Colloidal stability of (A) p(AAPBA<sub>60</sub>-*r*-GEA<sub>40</sub>) nanoparticles; (B) p(AAPBA<sub>80</sub>-*r*-GEA<sub>40</sub>) nanoparticles; (C) p(AAPBA<sub>100</sub>-*r*-GEA<sub>40</sub>) nanoparticles.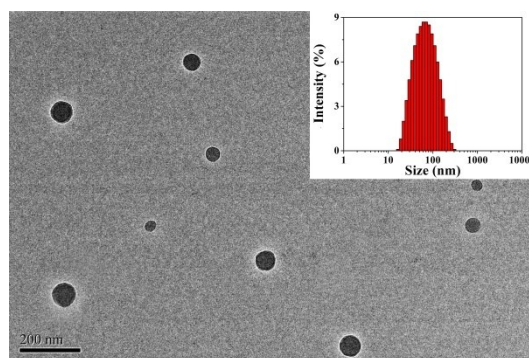**Fig. S5** TEM micrograph and size distribution measured by DLS of DEX-loaded p(AAPBA-*r*-GEA) NPs.**Table S3. EE and LC of the DEX-loaded p(AAPBA-*r*-GEA) nanoparticles<sup>a</sup>**

| Sample   | $D_H$ (nm)  | PDI         | Zeta potential (mV) | EE (%)     | LC (%)    |
|----------|-------------|-------------|---------------------|------------|-----------|
| NP1@DEX  | 68.3 ± 2.6  | 0.25 ± 0.04 | -19.0 ± 1.4         | 56.2 ± 1.5 | 7.8 ± 0.8 |
| NP2@DEX  | 83.7 ± 2.2  | 0.23 ± 0.03 | -21.5 ± 1.5         | 63.1 ± 2.1 | 8.6 ± 1.1 |
| NP3@DEX  | 116.8 ± 2.9 | 0.24 ± 0.01 | -25.0 ± 2.3         | 72.0 ± 1.9 | 9.8 ± 1.2 |
| <i>p</i> | < 0.05      | > 0.05      | < 0.05              | < 0.05     | > 0.05    |

<sup>a</sup> Each experiment was performed in triplicate and the results were reported as mean  $\pm$  SD.

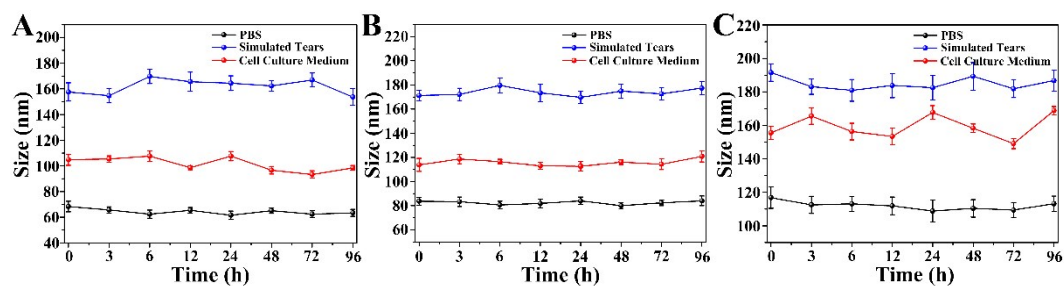

**Fig. S6** Colloidal stability of (A) NP1@DEX, (B) NP2@DEX and (C) NP3@DEX in PBS, simulated tears and cell culture medium.

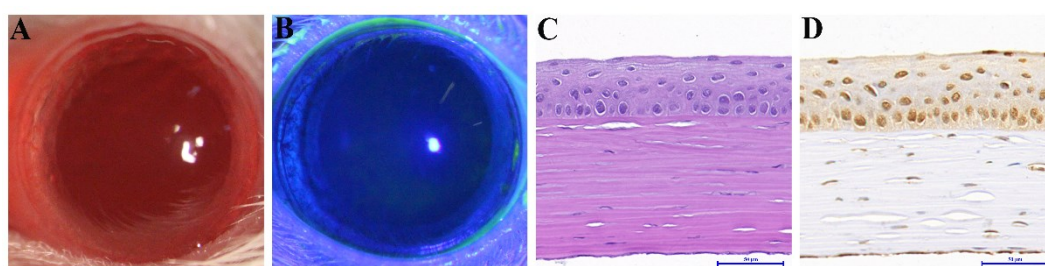

**Fig. S7** Slit lamp examination, H&E and TUNEL staining of the corneas of rats treated with p(AAPBA-r-GEA) nanoparticles (A: slit-lamp photograph; B: corneal fluorescein staining; C: H&E staining; D: TUNEL staining).

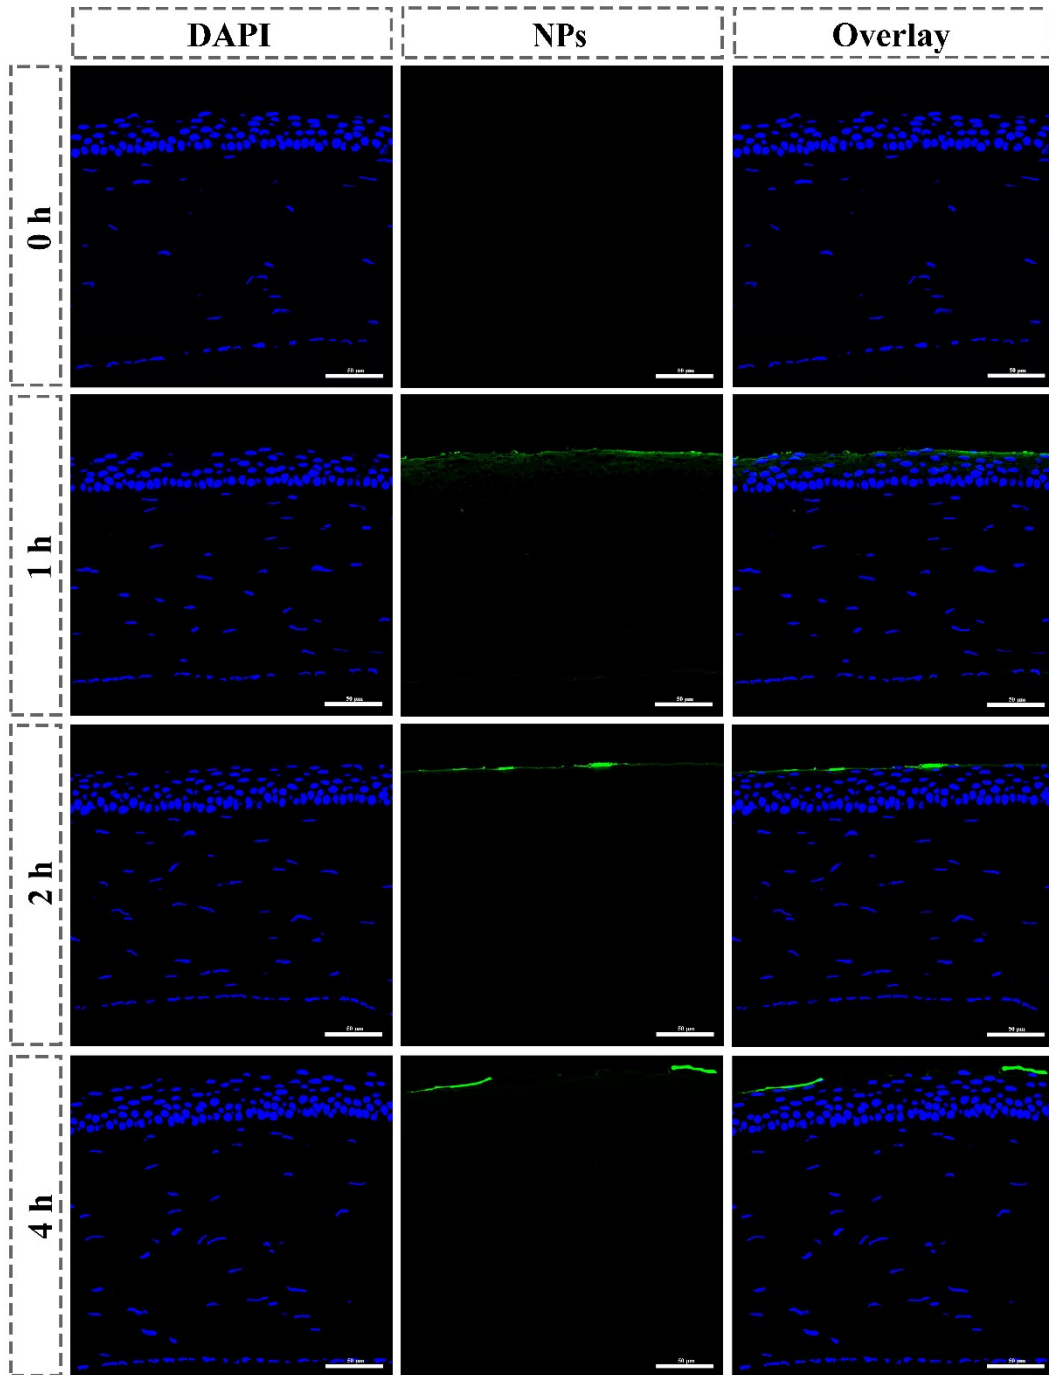

**Fig. S8** Inverted fluorescence micrographs of corneal penetration and persistence of BODIPY-labeled fluorescent nanoparticles after topical administration in the healthy cornea.

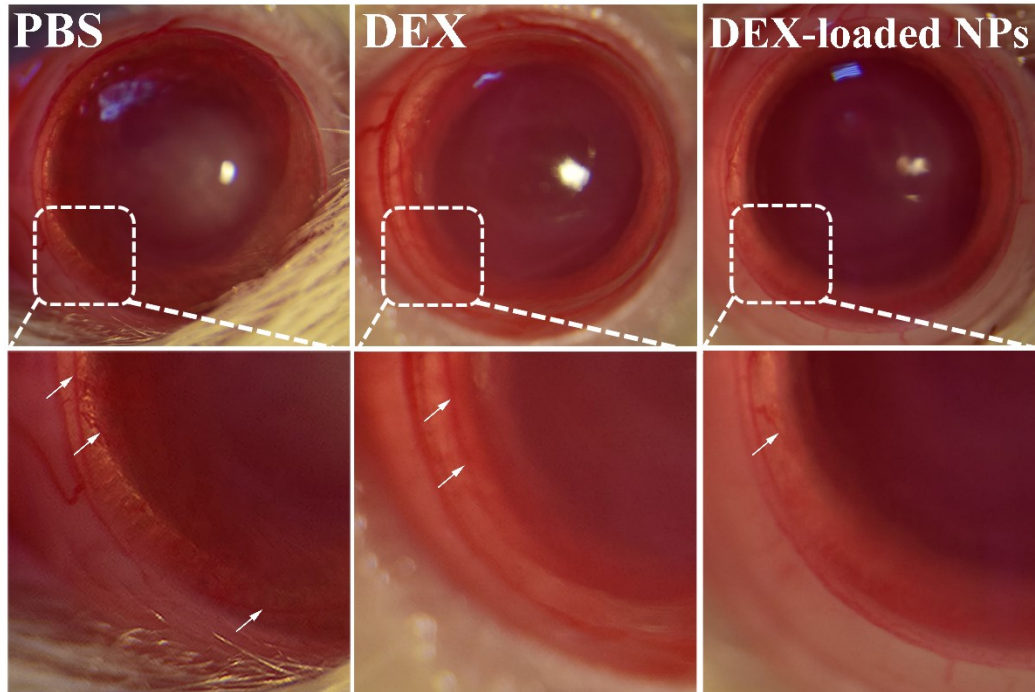

**Fig. S9** Representative images of CNV at 7 days posttreatment. The white arrows indicate CNV. \* $p < 0.05$ .

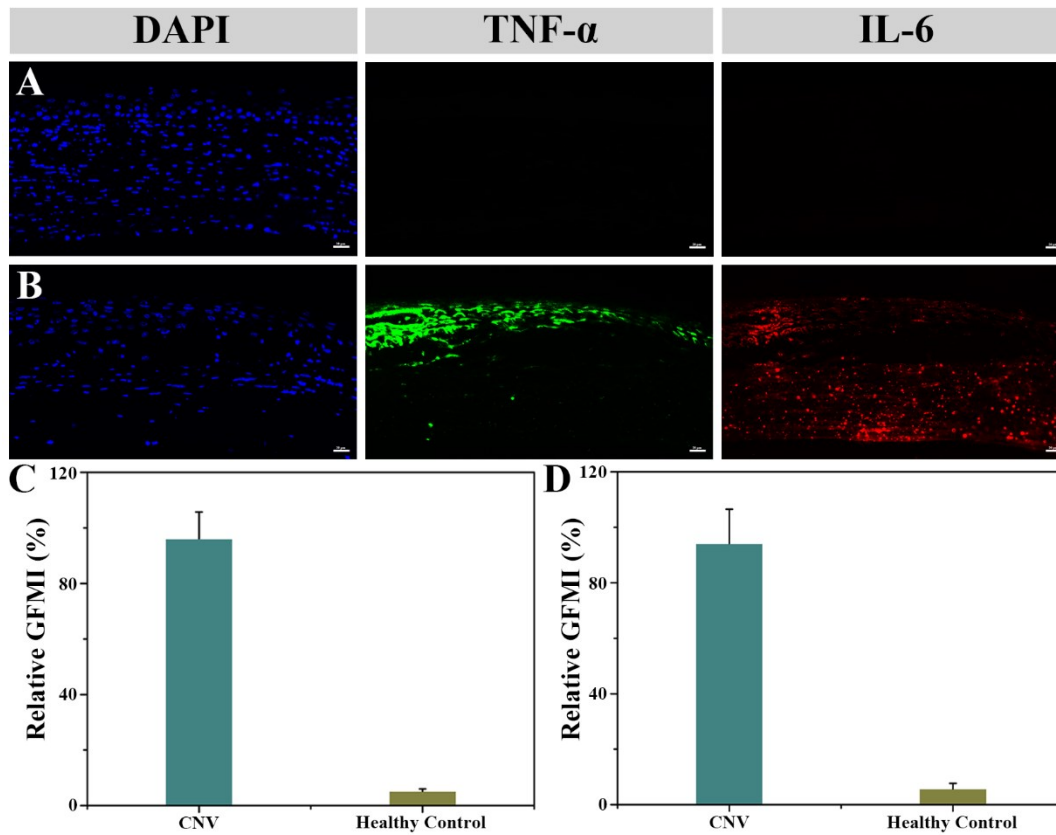

**Fig. S10** (A-B) Representative images of double-color immunofluorescence analysis of IL-6 and TNF- $\alpha$  in the corneas of healthy (A) and CNV (B) group after treatment with NP1. (C-D) GMFI analysis of TNF- $\alpha$  (C) and IL-6 (D) by Image J software.
